# Supplementary material for: Adverse pregnancy outcomes in women with systemic lupus erythematosus: can we improve predictions with machine learning?
Source: HighWire-hosted journal article supplement (doi:10.1136/lupus-2022-000769), 2022-09-01
Supplement: lupus-2022-000769supp001_data_supplement.pdf [file lupus-2022-000769supp001_data_supplement.pdf]

**Supplemental Table 1: PROMISSE predictors in analysis data set**

| <b>Variable</b>                   | <b>Values</b>                           |
|-----------------------------------|-----------------------------------------|
| <b>Demographics</b>               |                                         |
| Non-Hispanic White                | Yes/No                                  |
| Maternal Age                      | Years                                   |
| Gravidity number                  | Number                                  |
| Gravidity > 2                     | 1/2/>2                                  |
| Maternal BMI                      | <25/25-30/>30                           |
| <b>Clinical History</b>           |                                         |
| Systolic blood pressure           | mm Hg                                   |
| Diastolic blood pressure          | mm Hg                                   |
| Pregnancy morbidity <sup>†</sup>  | Yes/No                                  |
| Renal disease <sup>#</sup>        | Yes/No                                  |
| Thrombosis                        | Yes/No                                  |
| Current smoking status            | Current smoking/Not current             |
| Smoking history                   | Current or former smoking/never smoking |
| <b>Baseline Laboratory Values</b> |                                         |
| Urine protein >500 mg/day         | Yes/No                                  |
| Platelet count                    | Number/microliter                       |
| Anti-La (SSB)*                    | Positive/Negative                       |
| Anti-Ro (SSA)*                    | Positive/Negative                       |
| anti dsDNA*                       | Normal/High                             |
| C3*                               | Low/Normal                              |

|                                     |                                     |
|-------------------------------------|-------------------------------------|
| C4*                                 | Low/Normal                          |
| LAC*                                | Positive/Negative                   |
| aCL IgG <sup>§</sup>                | High Positive/Low Positive/Negative |
| aCL IgG Positive <sup>§</sup>       | High Positive: Yes/No               |
| aCL IgM <sup>§</sup>                | High Positive/Low Positive/Negative |
| aCL IgM Positive <sup>§</sup>       | High Positive: Yes/No               |
| aB2GP1 IgG <sup>§</sup>             | High Positive/Low Positive/Negative |
| aB2GP1 IgG Positive <sup>§</sup>    | High Positive: Yes/No               |
| aB2GP1 IgM <sup>§</sup>             | High Positive/Low Positive/Negative |
| aB2GP1 IgM Positive <sup>§</sup>    | High Positive: Yes/No               |
| <b>Disease Activity at Baseline</b> |                                     |
| SLEPDAI score                       | 0-105                               |
| PGA                                 | 0-3                                 |
| PGA > 1                             | Yes/No                              |
| <b>Medications</b>                  |                                     |
| Hydroxychloroquine Ever             | Ever/never                          |
| Hydroxychloroquine Current          | Current/Not current                 |
| Anti-hypertensive Ever              | Ever/never                          |
| Anti-hypertensive Current           | Current/Not current                 |
| Aspirin                             | Ever/never                          |
| Aspirin Current                     | Current/Not current                 |
| Heparin                             | Ever/never                          |
| Heparin Current                     | Current/Not current                 |

|                         |                     |
|-------------------------|---------------------|
| Glucocorticoids         | Ever/never          |
| Glucocorticoids Current | Current/Not current |

†Fetal death >10 WG with normal fetus AND/OR premature birth <34 WG due to severe preeclampsia or severe placental insufficiency AND/OR ≥3 unexplained spontaneous abortions <10 WG

#By ACR criteria for SLE: persistent proteinuria 0.5 gm/day, or > 3+, if quantification not performed and/or cellular casts (may be red, Hb, granular, tubular, or mixed).

\*By performing laboratory cutoff.

\$High Positive: ≥40 units; Low Positive: performing lab cutoff - 39 units; Negative: < performing lab cutoff .
